# Supplementary material
Source: PubMed Central journal article supplement (PMC4262465)
Supplement: supp_deu267_deu267supp_fig1.pdf [file supp_deu267_deu267supp_fig1.pdf]

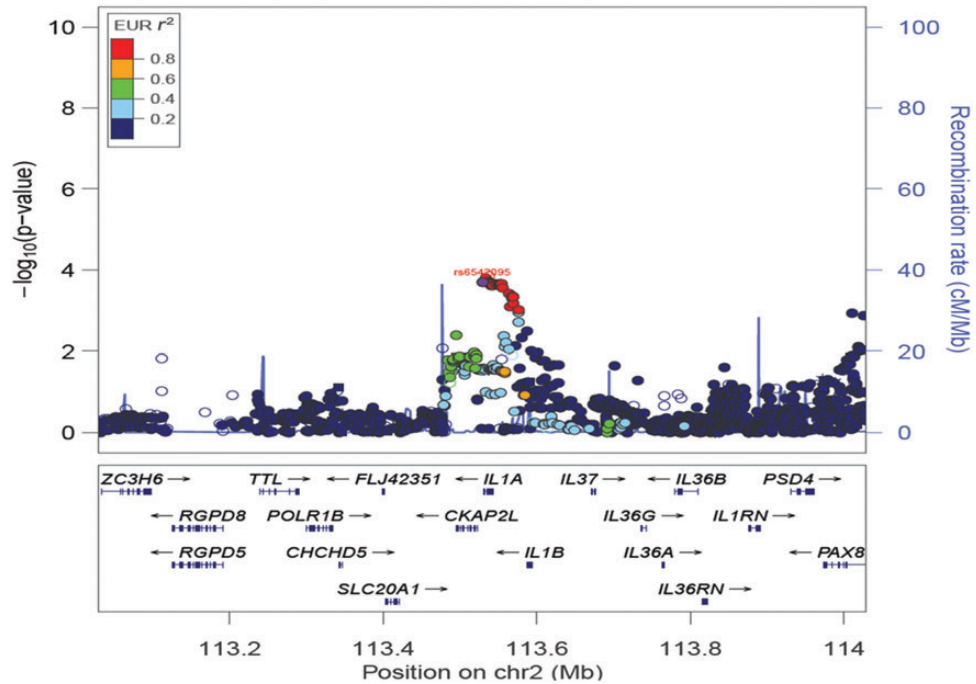

**Supplementary Figure S1** Evidence of association in ‘All’ endometriosis from the fixed-effect meta-analysis of variants in the *IL1A* region, using imputed data from QIMRHCS, OX and BBJ. Circles in the plot represent SNPs with no functional annotations. Squares represent SNPs located in either coding or untranslated regions. The index SNP (rs6542095) is represented by a purple circle. All other SNPs are colour coded according to the strength of LD with the best SNP (as measured by  $r^2$  in the European 1000 Genomes data).
