# Supplementary material
Source: PubMed Central journal article supplement (PMC4262465)
Supplement: supp_deu267_deu267supp_table1.pdf [file supp_deu267_deu267supp_table1.pdf]

**Supplementary Table S1** Top SNPs in meta-analysis of all variants in the *IL1A* regions, using individual QIMRHCS, OX and BBJ imputed data.

| Chr | SNP        | Position (bp) | RA | OA | QIMRHCS + OX + BBJ ('All') |          |               |                |           | QIMRHCS + OX + BBJ ('Grade_B') |          |               |                |           |
|-----|------------|---------------|----|----|----------------------------|----------|---------------|----------------|-----------|--------------------------------|----------|---------------|----------------|-----------|
|     |            |               |    |    | OR (95% CI)                | P        | Q statistic P | I <sup>2</sup> | Direction | OR (95% CI)                    | P        | Q statistic P | I <sup>2</sup> | Direction |
| 2   | rs1969294  | 113 538 490   | G  | A  | 0.89 (0.84–0.95)           | 1.35E–04 | 5.93E–01      | 0.00           | –         | 0.88 (0.82–0.95)               | 5.77E–04 | 2.06E–01      | 0.37           | –         |
| 2   | rs13000462 | 113 534 024   | C  | T  | 0.89 (0.84–0.95)           | 1.56E–04 | 1.91E–01      | 0.40           | –         | 0.86 (0.80–0.93)               | 6.42E–05 | 6.29E–02      | 0.64           | –         |
| 2   | rs3783543  | 113 536 651   | G  | A  | 0.90 (0.84–0.95)           | 1.90E–04 | 2.41E–01      | 0.30           | –         | 0.87 (0.81–0.93)               | 8.57E–05 | 7.26E–02      | 0.62           | –         |
| 2   | rs2071376  | 113 535 395   | T  | G  | 0.90 (0.84–0.95)           | 1.94E–04 | 2.40E–01      | 0.30           | –         | 0.87 (0.80–0.93)               | 8.52E–05 | 7.26E–02      | 0.62           | –         |
| 2   | rs3783550  | 113 532 885   | T  | G  | 0.90 (0.84–0.95)           | 1.94E–04 | 2.40E–01      | 0.30           | –         | 0.87 (0.80–0.93)               | 8.47E–05 | 7.33E–02      | 0.62           | –         |
| 2   | rs3783546  | 113 534 830   | C  | G  | 0.90 (0.84–0.95)           | 1.95E–04 | 2.39E–01      | 0.30           | –         | 0.87 (0.80–0.93)               | 8.52E–05 | 7.26E–02      | 0.62           | –         |
| 2   | rs3783533  | 113 538 779   | A  | G  | 0.90 (0.84–0.95)           | 1.97E–04 | 2.43E–01      | 0.29           | –         | 0.87 (0.81–0.93)               | 8.86E–05 | 7.26E–02      | 0.62           | –         |
| 2   | rs6542095  | 113 529 183   | T  | C  | 0.90 (0.84–0.95)           | 1.98E–04 | 2.34E–01      | 0.31           | –         | 0.86 (0.80–0.93)               | 8.03E–05 | 7.40E–02      | 0.62           | –         |
| 2   | rs1533463  | 113 538 782   | A  | G  | 0.90 (0.85–0.95)           | 2.04E–04 | 2.36E–01      | 0.31           | –         | 0.87 (0.81–0.93)               | 8.93E–05 | 7.15E–02      | 0.62           | –         |
| 2   | rs3783539  | 113 537 579   | C  | T  | 0.90 (0.85–0.95)           | 2.10E–04 | 2.25E–01      | 0.33           | –         | 0.87 (0.81–0.93)               | 9.64E–05 | 6.63E–02      | 0.63           | –         |
| 2   | rs3783525  | 113 541 819   | A  | T  | 0.90 (0.85–0.95)           | 2.13E–04 | 2.52E–01      | 0.27           | –         | 0.87 (0.81–0.93)               | 9.87E–05 | 7.34E–02      | 0.62           | –         |

Chr, chromosome; Position, chromosomal position (bp) based on Human Build 37 (GRCh37/hg19); RA, risk allele; OA, other allele; OR, odds ratio; CI, confidence interval; Q statistic P, Cochran's Q between-study heterogeneity test P-value; I<sup>2</sup>, percentage of variance attributable to between-study heterogeneity.
