# Supplementary material
Source: PubMed Central journal article supplement (PMC4262465)
Supplement: supp_deu267_deu267supp_table2.pdf [file supp_deu267_deu267supp_table2.pdf]

**Supplementary Table II Association of the *IL1A* variants in the European imputed data, conditioned on rs6542095.**

| Chr | SNP        | Pos (bp)    | RA | OA | QIMRHCS + OX ('All Endo') |          | QIMRHCS + OX ('Grade_B') |          |
|-----|------------|-------------|----|----|---------------------------|----------|--------------------------|----------|
|     |            |             |    |    | OR (95% CI)               | P        |                          | P        |
| 2   | rs11677416 | 113 529 240 | T  | C  | 1.05 (0.97–1.13)          | 2.05E–01 | 1.08 (0.97–1.2)          | 1.55E–01 |
| 2   | rs2856836  | 113 532 083 | A  | G  | 1.05 (0.97–1.13)          | 2.04E–01 | 1.08 (0.97–1.2)          | 1.55E–01 |
| 2   | rs1304037  | 113 532 236 | T  | C  | 1.05 (0.97–1.13)          | 2.04E–01 | 1.08 (0.97–1.2)          | 1.48E–01 |
| 2   | rs17561    | 113 537 223 | C  | A  | 1.05 (0.97–1.13)          | 2.02E–01 | 1.08 (0.97–1.2)          | 1.55E–01 |

Chr, chromosome; Position, chromosomal position (bp) based on Human Build 37 (GRCh37/hg19); RA, risk allele; OA, other allele; OR, odds ratio; CI, confidence interval.
